# Supplementary material for: Modelling doped (Ni, Pd, Pt) sulfur–nitrolic systems as new motifs for storage of hydrogen
Source: Royal Society of Chemistry journal article supplement (doi:10.1039/b915204k), 2009-01-01
Supplement: b915204k.pdf [file b915204k.pdf]

Supporting Information File

*Modelling Doped (Ni, Pd, Pt) Sulfur-Nitrolic Systems as New Motifs for Storage of Hydrogen*

Ayan Datta

Available Information:

1. Ground State Optimized geometries (at various levels of theory) and Energies.
2. Harmonic Frequencies.
3. Complete Reference for reference 33.

**S<sub>2</sub>N<sub>2</sub>**

| Atomic<br>Number | Coordinates (Angstroms) |           |           |
|------------------|-------------------------|-----------|-----------|
|                  | X                       | Y         | Z         |
| -----            |                         |           |           |
| 16               | 0.000000                | 0.000000  | 1.180751  |
| 16               | 0.000000                | 0.000000  | -1.180751 |
| 7                | 0.000000                | 1.179405  | 0.000000  |
| 7                | 0.000000                | -1.179405 | 0.000000  |

E(B3LYP/6-31+g(d,p)) = -905.773838690 Hartree

Vibrational Frequencies (in cm<sup>-1</sup>): 452.9734      625.7025      654.0806      755.6007  
920.1363      922.3112

**S<sub>3</sub>N<sub>3</sub><sup>-</sup>**

| Atomic<br>Number | Coordinates (Angstroms) |           |           |
|------------------|-------------------------|-----------|-----------|
|                  | X                       | Y         | Z         |
| -----            |                         |           |           |
| 16               | 0.000000                | 1.689141  | -0.067842 |
| 16               | 1.462839                | -0.844570 | -0.067842 |
| 16               | -1.462839               | -0.844570 | -0.067842 |
| 7                | 1.430576                | 0.825950  | 0.155067  |
| 7                | -1.430582               | 0.825940  | 0.155067  |
| 7                | 0.000000                | -1.651891 | 0.155067  |

E(MP2/6-31+g(d,p)) = -1356.6998972 Hartree

Vibrational Frequencies (in  $\text{cm}^{-1}$ ): 177.6025      177.6025      296.2314      360.5968  
 360.5968      529.1309      659.1083      700.5900      700.590

 $\text{S}_3\text{N}_3^-$ 

| Atomic<br>Number | Coordinates (Angstroms) |           |           |
|------------------|-------------------------|-----------|-----------|
|                  | X                       | Y         | Z         |
| -----            |                         |           |           |
| 16               | 0.000000                | 1.683293  | -0.042850 |
| 16               | 1.457774                | -0.841646 | -0.042850 |
| 16               | -1.457774               | -0.841646 | -0.042850 |
| 7                | 1.409315                | 0.813767  | 0.097944  |
| 7                | -1.409315               | 0.813767  | 0.097944  |
| 7                | 0.000000                | -1.627238 | 0.097944  |

E(B3LYP/6-31+g(d,p)) = -1358.76903562 Hartree

Vibrational Frequencies (in  $\text{cm}^{-1}$ ): 110.1508      110.1508      165.7850      372.5873  
 372.5873      562.0153      606.5959      606.5959      692.5165

 $\text{S}_3\text{N}_3^-$ 

| Atomic<br>Number | Coordinates (Angstroms) |           |          |
|------------------|-------------------------|-----------|----------|
|                  | X                       | Y         | Z        |
| -----            |                         |           |          |
| 16               | 1.430747                | 0.826042  | 0.000000 |
| 16               | -1.430747               | 0.826042  | 0.000000 |
| 16               | 0.000000                | -1.652085 | 0.000000 |
| 7                | 0.000000                | 1.556568  | 0.000000 |
| 7                | 1.348027                | -0.778284 | 0.000000 |
| 7                | -1.348027               | -0.778284 | 0.000000 |

E(HF/6-31+g(d,p)) = -1355.73065637 Hartree

Vibrational Frequencies (in  $\text{cm}^{-1}$ ): 145.6867 145.6867 185.5533 428.6610  
 428.6610 674.9271 674.9271 675.6317 807.5378

$\text{S}_4\text{N}_4^{2+}$

| Atomic<br>Number | Coordinates (Angstroms) |           |          |
|------------------|-------------------------|-----------|----------|
|                  | X                       | Y         | Z        |
| 16               | 1.543220                | 1.543220  | 0.000000 |
| 16               | -1.543220               | -1.543220 | 0.000000 |
| 16               | 1.543220                | -1.543220 | 0.000000 |
| 16               | -1.543220               | 1.543220  | 0.000000 |
| 7                | 0.000000                | 1.909239  | 0.000000 |
| 7                | 1.909239                | 0.000000  | 0.000000 |
| 7                | -1.909239               | 0.000000  | 0.000000 |
| 7                | 0.000000                | -1.909239 | 0.000000 |

E(B3LYP/6-31+g(d,p)) = -1810.83753553 Hartree

Vibrational Frequencies (in  $\text{cm}^{-1}$ ): 61.1476 128.3552 168.8538 221.2926  
 407.1237 425.1589 425.1589 426.1079 426.1079

$\text{S}_4\text{N}_4^{2-}$

| Atomic<br>Number | Coordinates (Angstroms) |           |           |
|------------------|-------------------------|-----------|-----------|
|                  | X                       | Y         | Z         |
| 16               | -1.423371               | -0.117561 | -1.622465 |
| 16               | -1.578891               | -0.034519 | 1.407518  |
| 16               | 1.578891                | 0.034519  | -1.407518 |

|    |           |           |           |
|----|-----------|-----------|-----------|
| 16 | 1.423371  | 0.117561  | 1.622465  |
| 7  | -1.688239 | -0.811009 | -0.127902 |
| 7  | 0.141559  | 0.073462  | -2.245884 |
| 7  | 1.688239  | 0.811009  | 0.127902  |
| 7  | -0.141559 | -0.073462 | 2.245884  |

E(B3LYP/6-31+g(d,p)) = -1811.57282710 Hartree

Vibrational Frequencies (in  $\text{cm}^{-1}$ ): 41.2831      53.4242      80.8793      163.8112  
 200.9082      262.7638      308.4387      384.2832      467.6903

### **S<sub>2</sub>N<sub>2</sub> + 2H<sub>2</sub>**

| Atomic<br>Number | Coordinates (Angstroms) |           |           |
|------------------|-------------------------|-----------|-----------|
|                  | X                       | Y         | Z         |
| -----            |                         |           |           |
| 16               | 1.188914                | 0.000000  | 0.000000  |
| 16               | -1.188914               | 0.000000  | 0.000000  |
| 7                | 0.000000                | 0.000000  | 1.198400  |
| 7                | 0.000000                | 0.000000  | -1.198400 |
| 1                | 0.000000                | 3.175114  | -0.367611 |
| 1                | 0.000000                | 3.175114  | 0.367611  |
| 1                | 0.000000                | -3.175114 | -0.367611 |
| 1                | 0.000000                | -3.175114 | 0.367611  |

E(MP2/6-31+g(d,p)) = -906.024629820 Hartree

Vibrational Frequencies (in  $\text{cm}^{-1}$ ): 47.3040      61.8656      100.1580      116.6759  
 117.1555      120.8050      135.5860      137.0448      145.9603

**S<sub>4</sub>N<sub>4</sub><sup>2+</sup> + 2H<sub>2</sub>**

| Atomic<br>Number | Coordinates (Angstroms) |             |             |
|------------------|-------------------------|-------------|-------------|
|                  | X                       | Y           | Z           |
| 16               | 1.54826200              | 1.54826200  | 0.00000000  |
| 16               | -1.54826200             | -1.54826200 | 0.00000000  |
| 16               | 1.54826200              | -1.54826200 | 0.00000000  |
| 16               | -1.54826200             | 1.54826200  | 0.00000000  |
| 7                | 0.00000000              | 1.94927800  | 0.00000000  |
| 7                | 1.94927800              | 0.00000000  | 0.00000000  |
| 7                | -1.94927800             | 0.00000000  | 0.00000000  |
| 7                | 0.00000000              | -1.94927800 | 0.00000000  |
| 1                | 0.00000000              | 0.00000000  | 2.34007400  |
| 1                | 0.00000000              | 0.00000000  | 3.07805500  |
| 1                | 0.00000000              | 0.00000000  | -2.34007400 |
| 1                | 0.00000000              | 0.00000000  | -3.07805500 |

E(MP2/6-31+g(d,p)) = -1810.43067804 Hartree

Vibrational Frequencies (in cm<sup>-1</sup>): 54.2984                    91.8927                    91.8927                    108.6794  
108.6794                    149.2113                    159.5969                    198.0359                    205.2093

**S<sub>2</sub>N<sub>2</sub> + Ni + 3H<sub>2</sub>**

| Atomic<br>Number | Coordinates (Angstroms) |          |          |
|------------------|-------------------------|----------|----------|
|                  | X                       | Y        | Z        |
| 16               | -0.017780               | 1.360407 | 1.197581 |

|    |           |           |           |
|----|-----------|-----------|-----------|
| 16 | -0.017780 | 1.360407  | -1.197581 |
| 7  | 0.050567  | 0.193581  | 0.000000  |
| 7  | -0.070941 | 2.515160  | 0.000000  |
| 1  | -0.121297 | -1.874368 | 1.494758  |
| 1  | -0.121297 | -1.874368 | -1.494758 |
| 1  | 1.615136  | -2.030417 | -0.399132 |
| 28 | -0.017780 | -1.770235 | 0.000000  |
| 1  | 1.615136  | -2.030417 | 0.399132  |
| 1  | -1.411325 | -1.976463 | 0.000000  |
| 1  | -0.366911 | -3.141595 | 0.000000  |

E(B3LYP/split-basis) = -1078.81465353 Hartree

Vibrational Frequencies (in  $\text{cm}^{-1}$ ): 59.8253                      96.7696                      112.5746                      229.9559  
 287.2986                      362.8311                      392.4692                      456.1530                      468.5490

### **S<sub>2</sub>N<sub>2</sub> + Pd + 3H<sub>2</sub>**

| Atomic<br>Number | Coordinates (Angstroms) |           |           |
|------------------|-------------------------|-----------|-----------|
|                  | X                       | Y         | Z         |
| -----            |                         |           |           |
| 16               | -0.019130               | 1.804735  | 1.196057  |
| 16               | -0.019130               | 1.804735  | -1.196057 |
| 7                | 0.071837                | 0.639460  | 0.000000  |
| 7                | -0.095603               | 2.959486  | 0.000000  |
| 46               | -0.019130               | -1.554995 | 0.000000  |
| 1                | -0.268347               | -3.056248 | 0.000000  |
| 1                | -0.135525               | -1.647869 | 1.633505  |
| 1                | -1.528839               | -1.686635 | 0.000000  |
| 1                | 1.863361                | -1.687889 | -0.392965 |
| 1                | -0.135525               | -1.647869 | -1.633505 |

1            1.863361 -1.687889 0.392965

E(B3LYP/split-basis) = -1036.66505059 Hartree

Vibrational Frequencies (in  $\text{cm}^{-1}$ ):    34.8329            82.3223            91.2614    173.5262  
 294.5380            381.9204    433.9928            452.3756            483.6843

**S<sub>2</sub>N<sub>2</sub> +Pt+3H<sub>2</sub>**

| Atomic<br>Number | Coordinates (Angstroms) |           |           |
|------------------|-------------------------|-----------|-----------|
|                  | X                       | Y         | Z         |
| 16               | -2.207537               | -1.195837 | 0.000000  |
| 16               | -2.197943               | 1.196840  | 0.000000  |
| 7                | -1.036724               | -0.003927 | -0.000255 |
| 7                | -3.358987               | 0.005149  | 0.000000  |
| 1                | 1.263809                | -1.310926 | -0.951968 |
| 1                | 1.248725                | 1.621516  | -0.008055 |
| 1                | 1.249834                | 0.499030  | 1.540938  |
| 78               | 1.182854                | -0.000326 | 0.000000  |
| 1                | 1.263433                | -1.297838 | 0.969702  |
| 1                | 1.250238                | 0.481655  | -1.546448 |
| 1                | 2.719025                | 0.007413  | -0.000798 |

E(B3LYP/split-basis) = -1029.13755645 Hartree

Vibrational Frequencies (in  $\text{cm}^{-1}$ ):    8.1783            99.9645            102.8116    161.7897  
 400.8790            411.3685    450.1117            471.1522            512.2589

Complete Reference 33:

Supplementary Material (ESI) for *PCCP*

This journal is © the Owner Societies 2009

Gaussian 03, Revision C.01,

M. J. Frisch, G. W. Trucks, H. B. Schlegel, G. E. Scuseria, M. A. Robb, J. R. Cheeseman, J. A. Montgomery, Jr., T. Vreven, K. N. Kudin, J. C. Burant, J. M. Millam, S. S. Iyengar, J. Tomasi, V. Barone, B. Mennucci, M. Cossi, G. Scalmani, N. Rega, G. A. Petersson, H. Nakatsuji, M. Hada, M. Ehara, K. Toyota, R. Fukuda, J. Hasegawa, M. Ishida, T. Nakajima, Y. Honda, O. Kitao, H. Nakai, M. Klene, X. Li, J. E. Knox, H. P. Hratchian, J. B. Cross, C. Adamo, J. Jaramillo, R. Gomperts, R. E. Stratmann, O. Yazyev, A. J. Austin, R. Cammi, C. Pomelli, J. W. Ochterski, P. Y. Ayala, K. Morokuma, G. A. Voth, P. Salvador, J. J. Dannenberg, V. G. Zakrzewski, S. Dapprich, A. D. Daniels, M. C. Strain, O. Farkas, D. K. Malick, A. D. Rabuck, K. Raghavachari, J. B. Foresman, J. V. Ortiz, Q. Cui, A. G. Baboul, S. Clifford, J. Cioslowski, B. B. Stefanov, G. Liu, A. Liashenko, P. Piskorz, I. Komaromi, R. L. Martin, D. J. Fox, T. Keith, M. A. Al-Laham, C. Y. Peng, A. Nanayakkara, M. Challacombe, P. M. W. Gill, B. Johnson, W. Chen, M. W. Wong, C. Gonzalez, and J. A. Pople, Gaussian, Inc., Wallingford CT, 2004.
